# Supplementary material for: Temporal Changes of the Oral and Fecal Microbiota after Mild Traumatic Brain Injury in Rats by 16S rRNA Sequencing
Source: Microorganisms. 2023 May 31;11(6):1452. doi: 10.3390/microorganisms11061452 (PMC10301108; doi:10.3390/microorganisms11061452)
Supplement: Supplementary file 1 [file microorganisms-11-01452-s001.zip › microorganisms-2390251-supplementary.pdf]

Table S1. Modified Neurological Severity Score Points

|                                                                                               |    |
|-----------------------------------------------------------------------------------------------|----|
| Motor tests                                                                                   |    |
| Raising rat by tail                                                                           | 3  |
| Flexion of forelimb                                                                           | 1  |
| Flexion of hindlimb                                                                           | 1  |
| Head moved >10° to vertical axis within 30s                                                   | 1  |
| Placing rat on floor (normal=0; maximum=3)                                                    | 3  |
| Normal walk                                                                                   | 0  |
| Inability to walk straight                                                                    | 1  |
| Circling toward paretic side                                                                  | 2  |
| Falls down to paretic side                                                                    | 3  |
| Sensory tests                                                                                 | 2  |
| Placing test (visual and tactile test)                                                        | 1  |
| Proprioceptive test deep sensation, pushing paw against table edge to stimulate limb muscles) | 1  |
| Beam balance tests (normal=0; maximum=6)                                                      | 6  |
| Balance with steady posture                                                                   | 0  |
| Grasps side of beam                                                                           | 1  |
| Huge beam and 1 limb fall down from beam                                                      | 2  |
| Huge beam and 2 limb fall down from beam, or spins on beam (>60s)                             | 3  |
| Attempts to balance on beam but falls off (>40s)                                              | 4  |
| Attempts to balance on beam but falls off (>20s)                                              | 5  |
| Falls off; no attempt to balance or hang on to beam (<20s)                                    | 6  |
| Reflex absence and abnormal movements                                                         | 4  |
| Pinna reflex (head shake when auditory meatus is touched)                                     | 1  |
| Corneal reflex (eye blink when cornea is lightly touched with cotton)                         | 1  |
| Startle reflex (motor response to a brief noise from snapping a clipboard paper)              | 1  |
| Seizures, myoclonus, myodystonia                                                              | 1  |
| Maximum points                                                                                | 18 |

Table S1. The details of Modified Neurological Severity Score Points (mNSS). One point is awarded for inability to perform the tasks of for lack of a tested reflex: 13-18, severe injury; 7-12 moderate injury; 1-6, mild injury.
